# Supplementary material
Source: PubMed Central journal article supplement (PMC9343610)

a

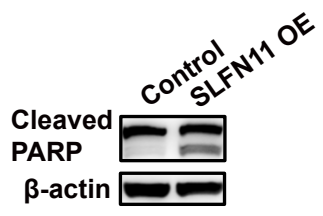

b

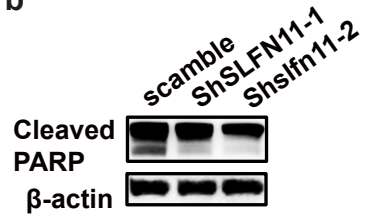

Fig. S1

**a**

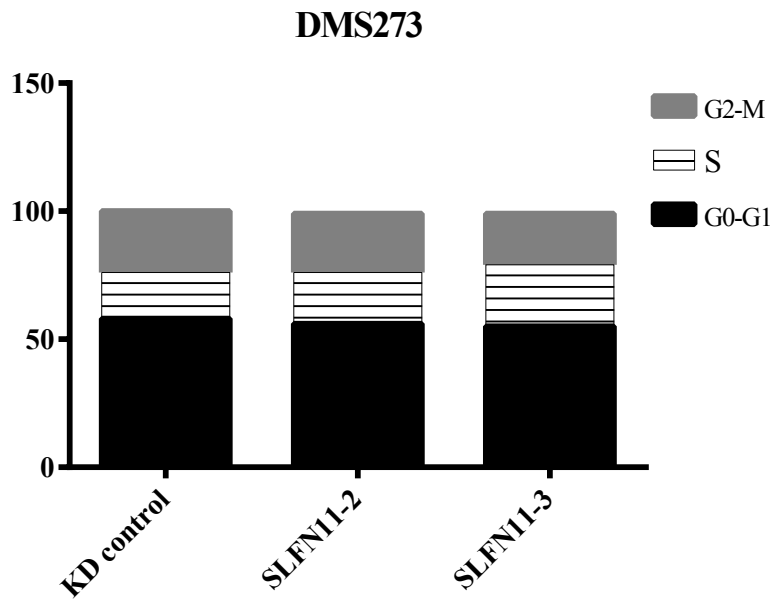

**b**

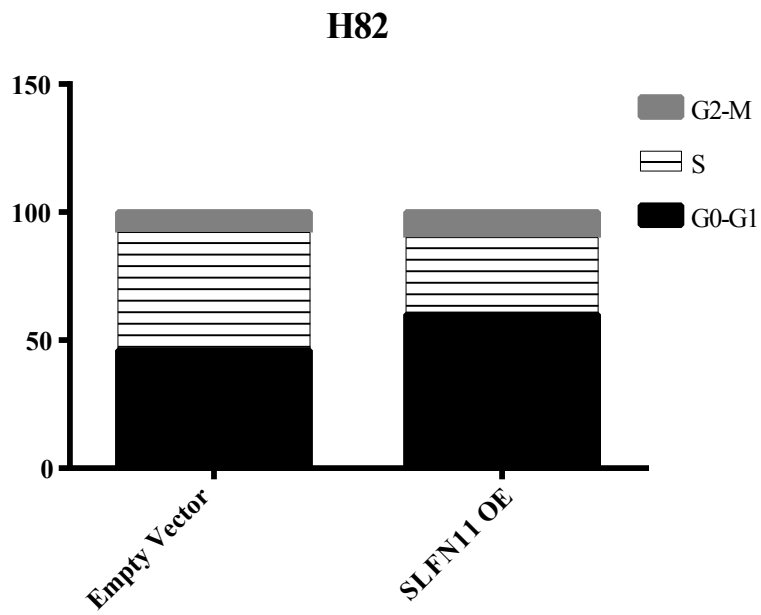

**Fig. S2**

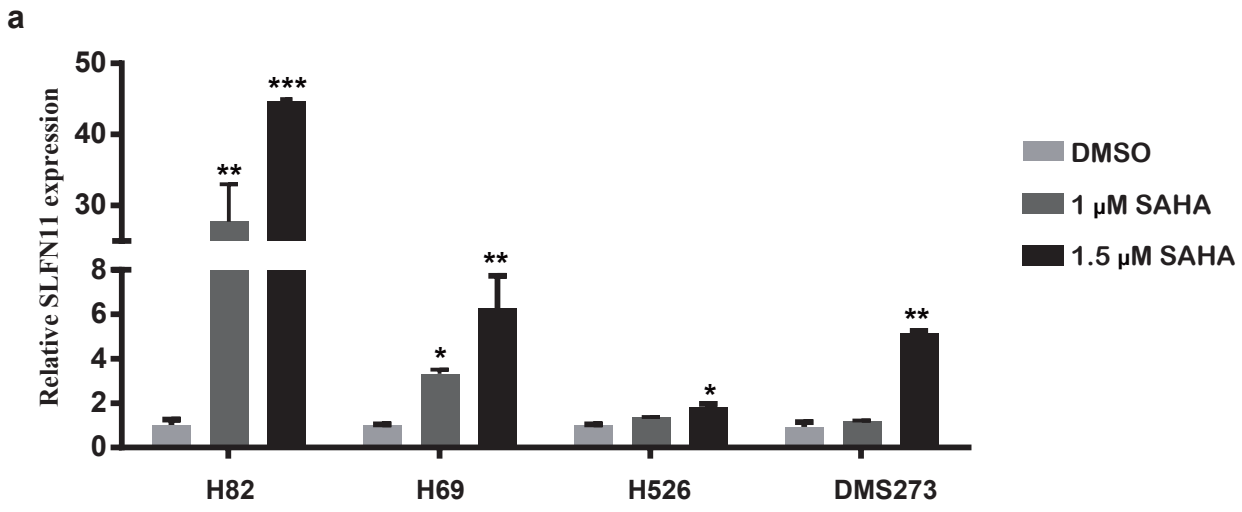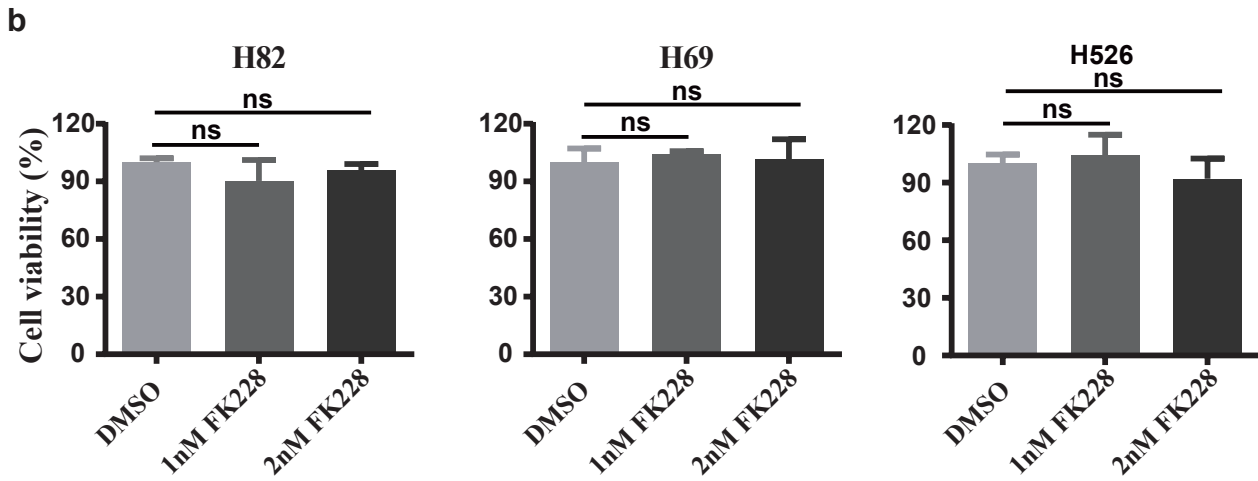

**Fig. S3**

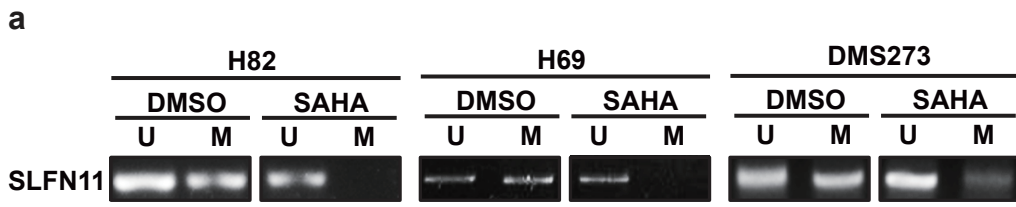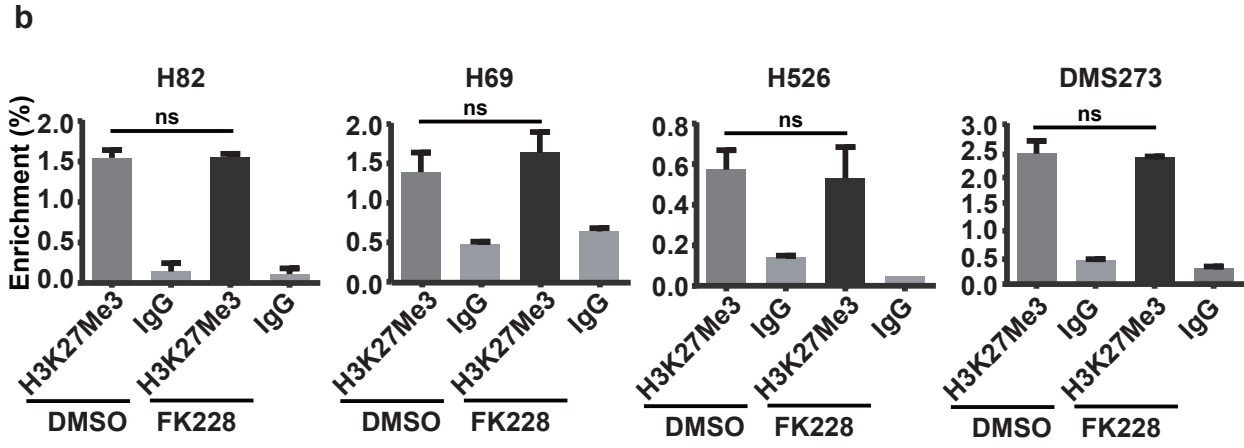

**Fig. S4**

Supplement: 41401_2021_817_MOESM2_ESM.pdf [file 41401_2021_817_MOESM2_ESM.pdf]
